# Supplementary material for: Cellular Metabolic Heterogeneity In Vivo Is Recapitulated in Tumor Organoids
Source: PubMed Central journal article supplement — Neoplasia. 2019 May 9;21(6):615–26. doi: 10.1016/j.neo.2019.04.004 (PMC6514366; doi:10.1016/j.neo.2019.04.004), 2019-05-09
Supplement: mmc1.pdf [file mmc1.pdf]

# Supplemental info

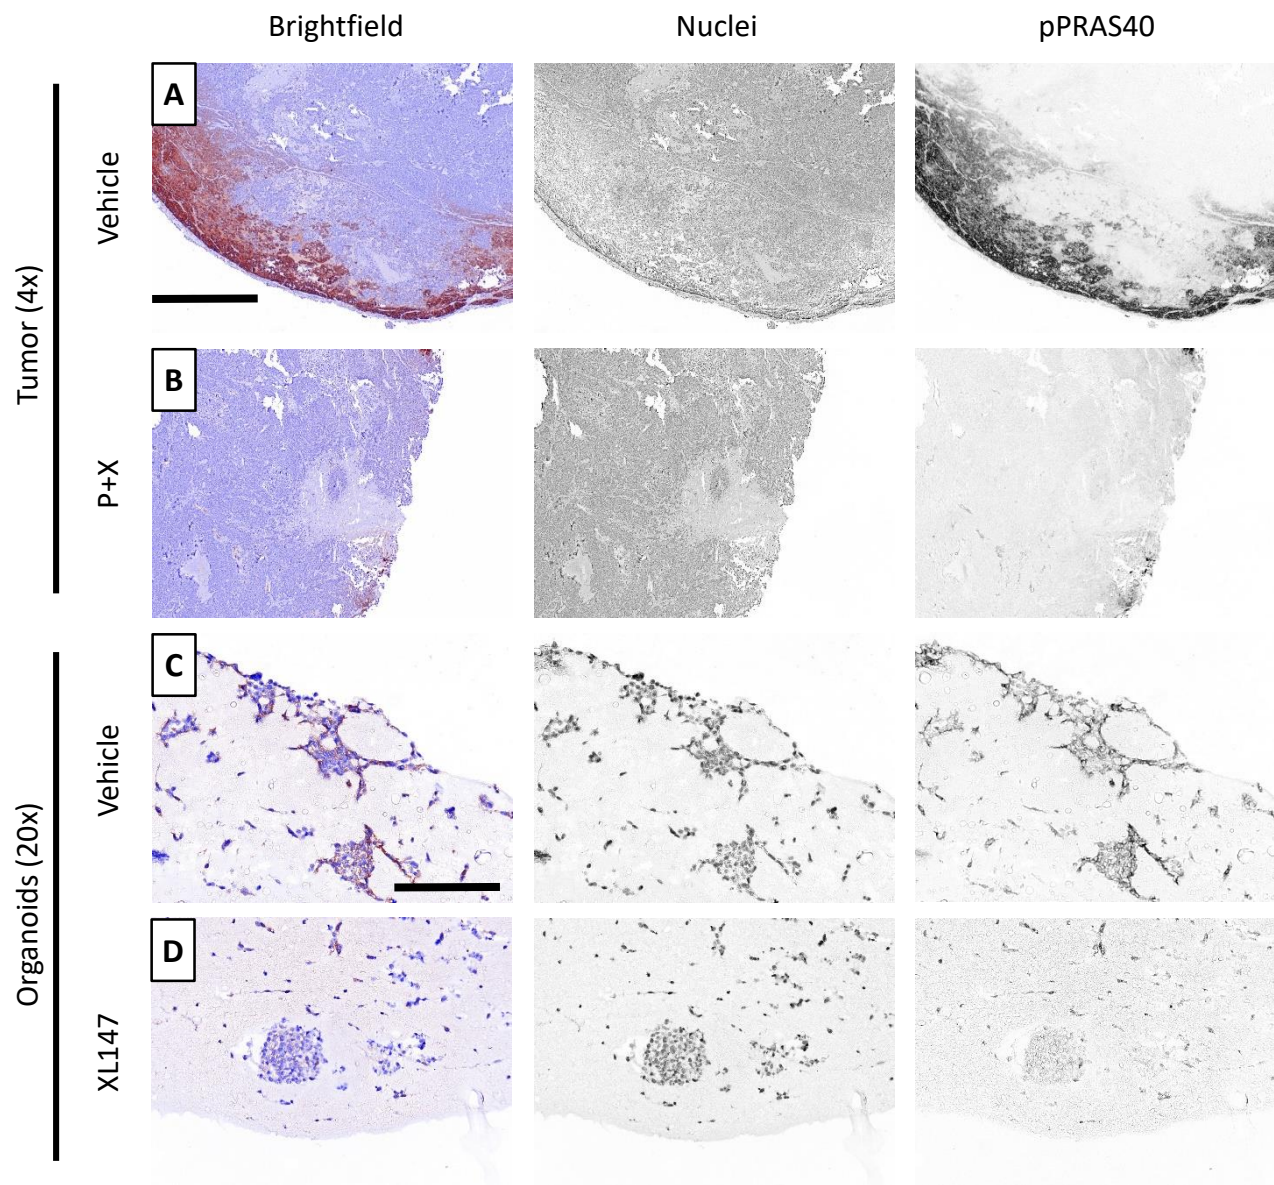

**Supplementary Figure S1. Decreased expression of pPRAS40 with treatment in PyVmT tumors and organoids.** A-B, Example histology and spectral unmixing of pPRAS40 expression in PyVmT tumors treated with vehicle (A) and paclitaxel and XL147 (P+X) for 48 hours (B). C-D, Examples of pPRAS40 expression in PyVmT organoids treated with vehicle (C) and XL147 for 72 hours (D). 4x scale bar = 1 mm. 20x scale bar = 200  $\mu$ m.

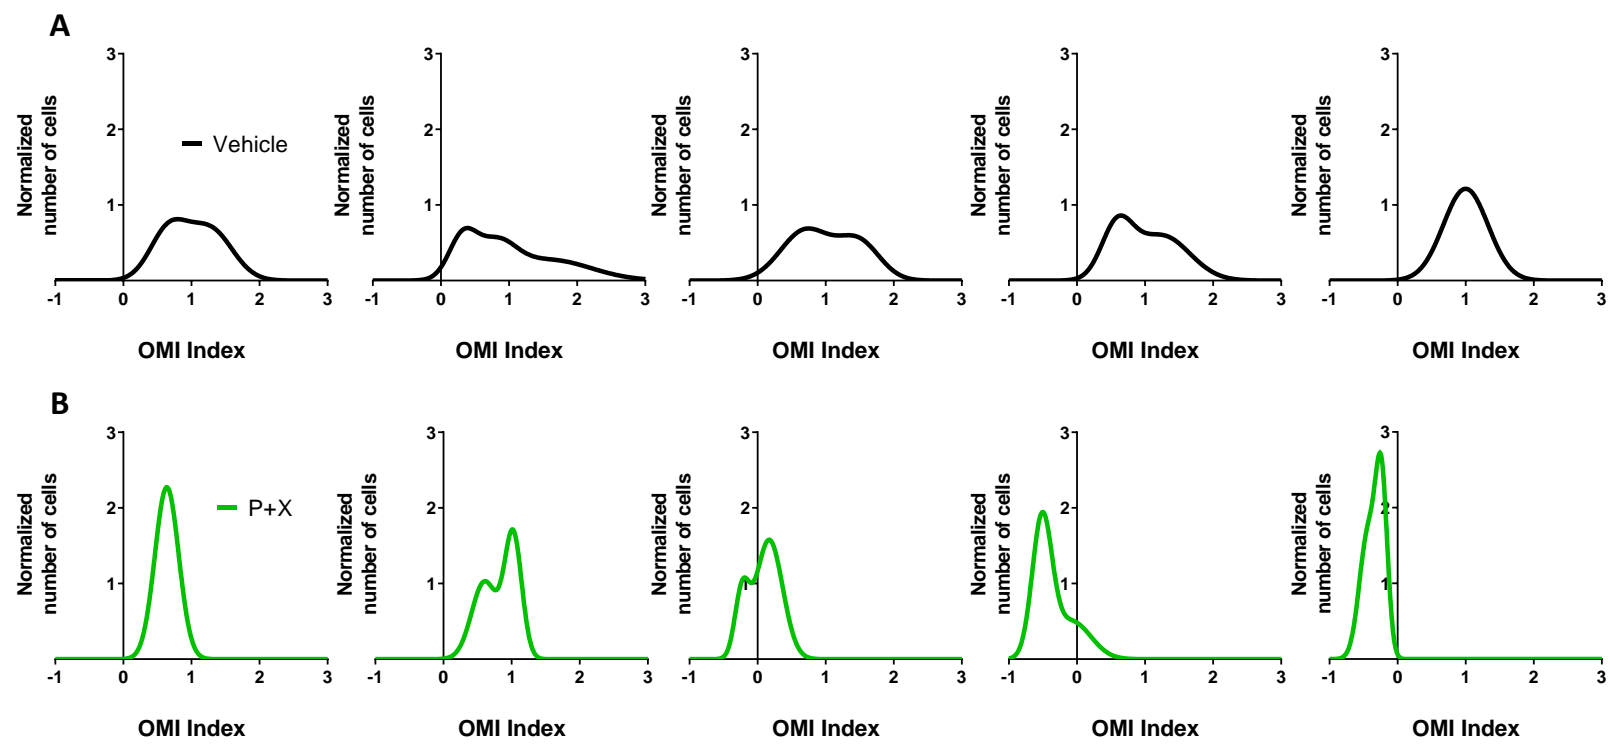

**Supplementary Figure S2. OMI index heterogeneity in individual PyVmT tumors.** Distributions of drug response at the single-cell level for (A) vehicle and (B) P+X treated tumors.

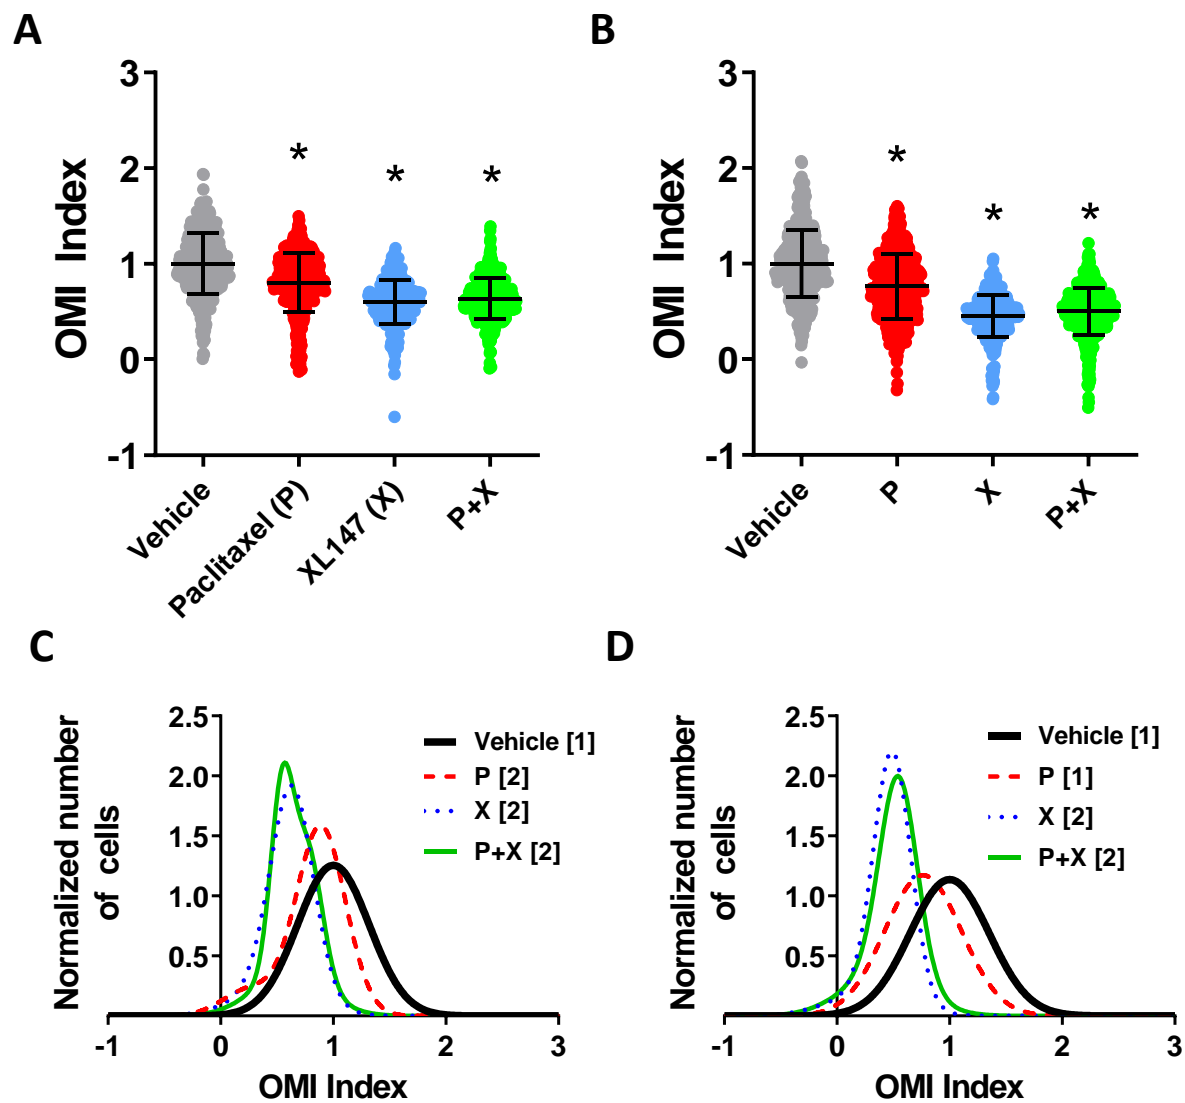

**Supplementary Figure S3. OMI of drug response heterogeneity in PyVmT organoids at additional time points.** **A-B**, OMI index quantified at the single cell level at **(A)** 24 hours and **(B)** 48 hours of treatment.  $N=6$  organoids/group.  $N>290$  cells/group. Error bars indicate mean  $\pm$  SD. \*  $p<0.0001$  vs. vehicle. **C-D**, Example subpopulation analysis of the OMI index in all organoid cells at **(C)** 24 hours and **(D)** 48 hours of treatment. Brackets in legend indicate number of subpopulations for each group.

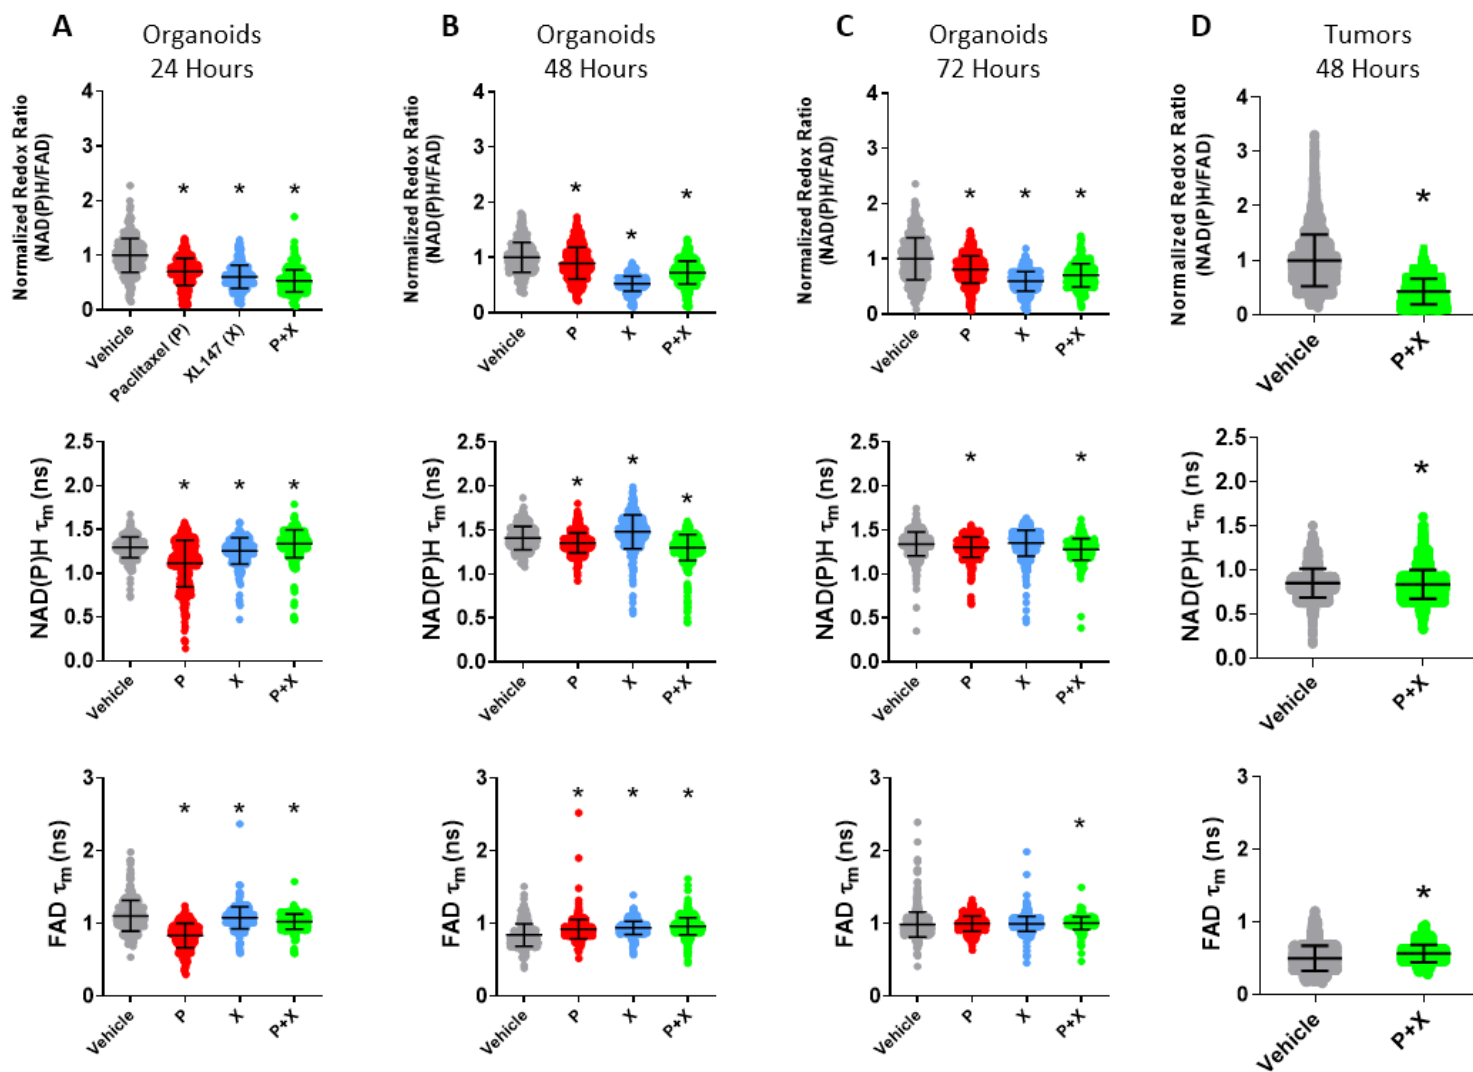

**Supplementary Figure S4. OMI endpoints of drug response in single cells.** Normalized redox ratio, NAD(P)H  $\tau_m$ , and FAD  $\tau_m$  at (A) 24 hours, (B) 48 hours, (C) 72 hours in PyVmT organoids, and at (D) 48 hours in PyVmT tumors. Error bars indicate mean  $\pm$  SD. \*  $p < 0.0001$  vs. vehicle. Each dot represents one cell.

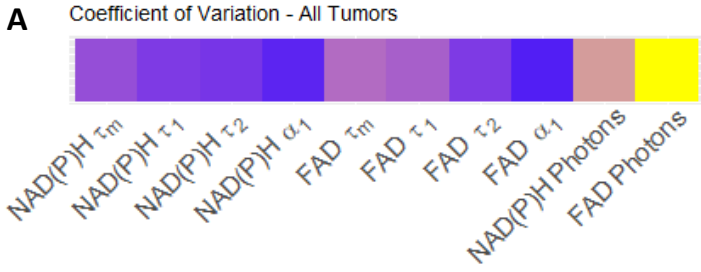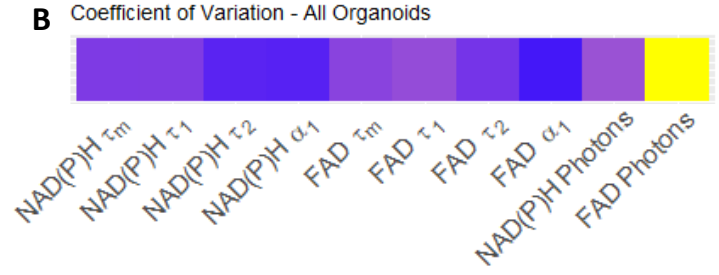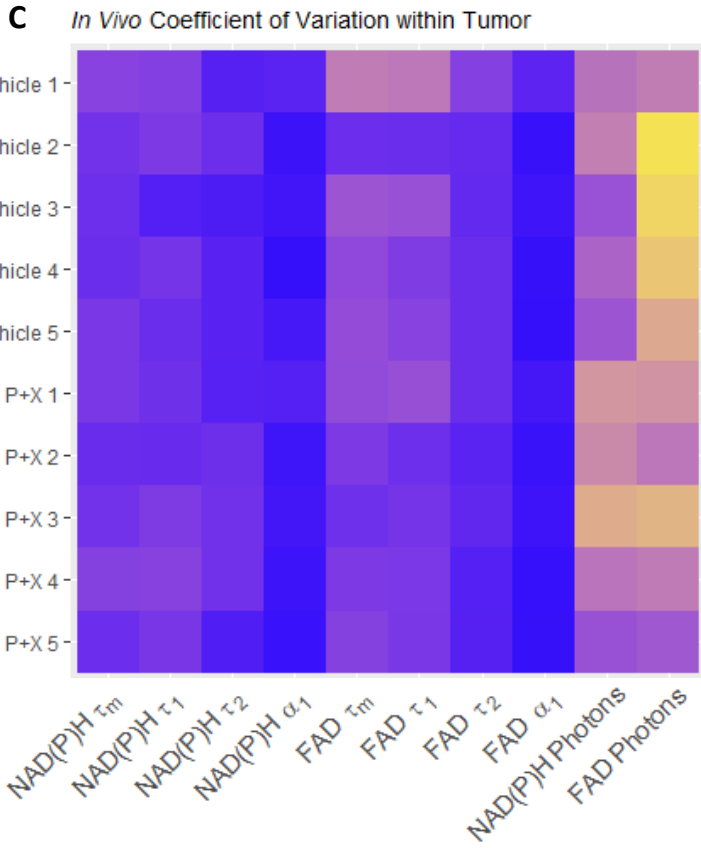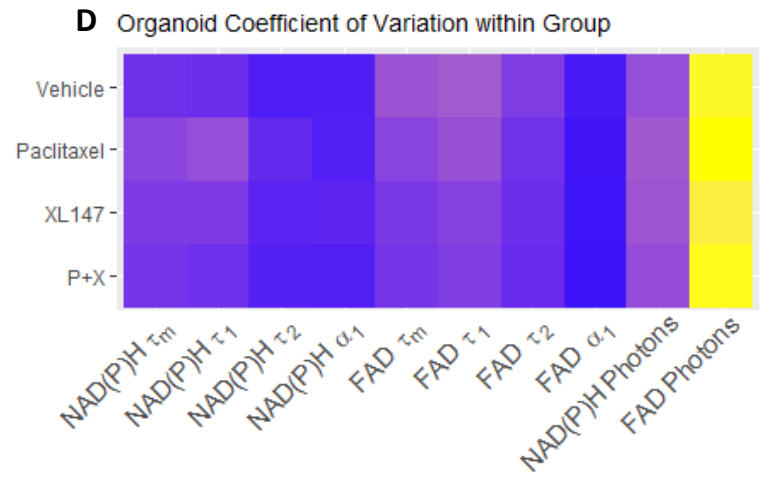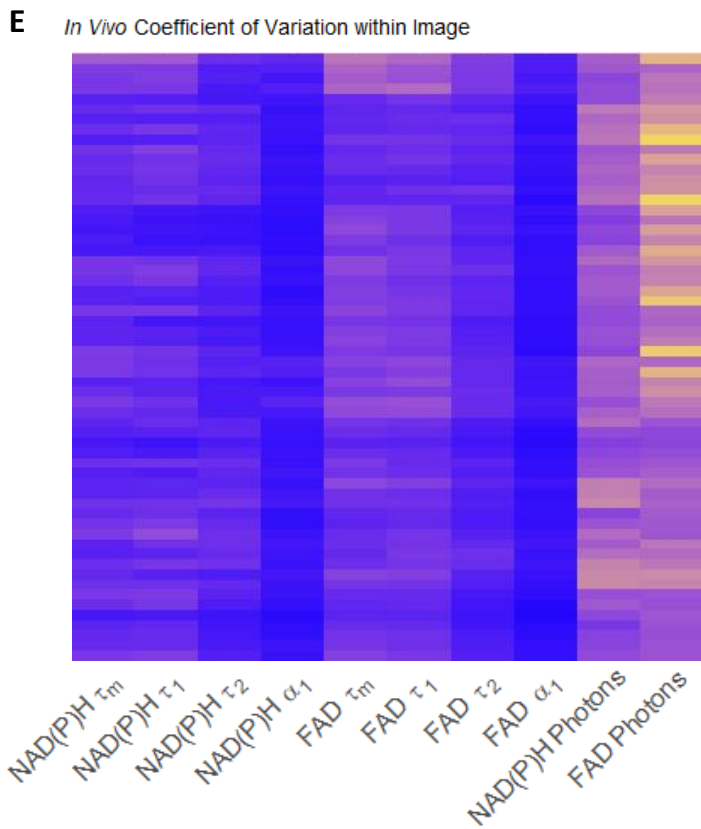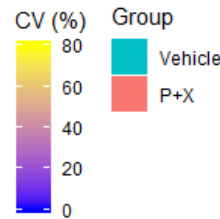

**F** Organoid Coefficient of Variation within Organoid

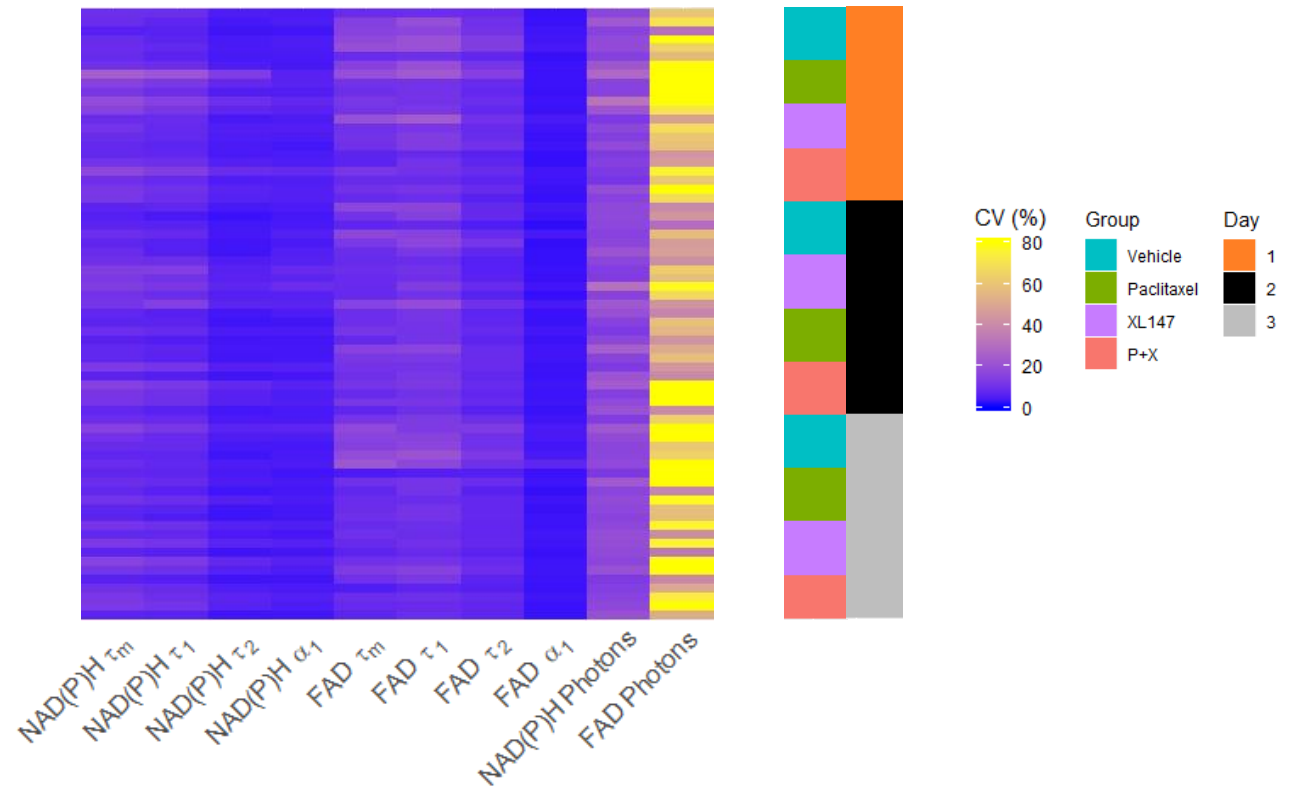

**Supplementary Figure S5. Coefficients of variation of OMI variables across individual cells.** **A-B**, Coefficients of variation (standard deviation divided by the mean, CV) of each OMI variable across all cells imaged (**A**) *in vivo* and (**B**) in tumor-derived organoids. **C**, CV of each OMI variable within each tumor *in vivo*. Each row represents a tumor. **D**, CVs of each OMI variable within each treatment group in organoids. Each row represents a treatment group. **E**, CVs of each OMI variable within each field of view (FOV) imaged *in vivo*. Each row represents a FOV. **F**, CVs of each OMI variable within each organoid. Each row represents an organoid.



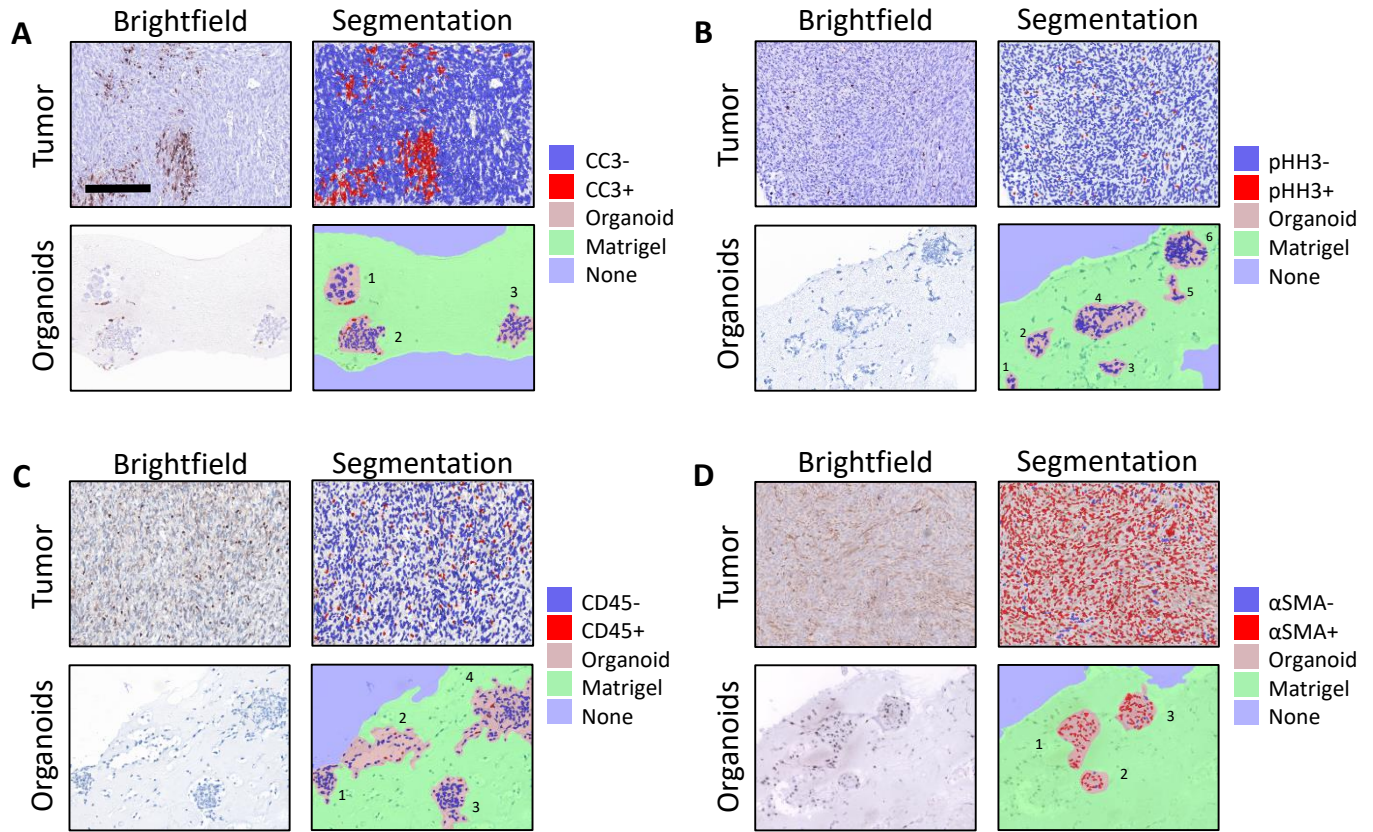

**Supplementary Figure S6. Automatic cell segmentation and quantification in PyVmT tumors and organoids with histology.** Examples images of (A) CC3, (B) pHH3, (C) CD45, and (D)  $\alpha$ SMA expression in 20x histology images of PyVmT tumor and organoids. Scale bar = 200  $\mu$ m.



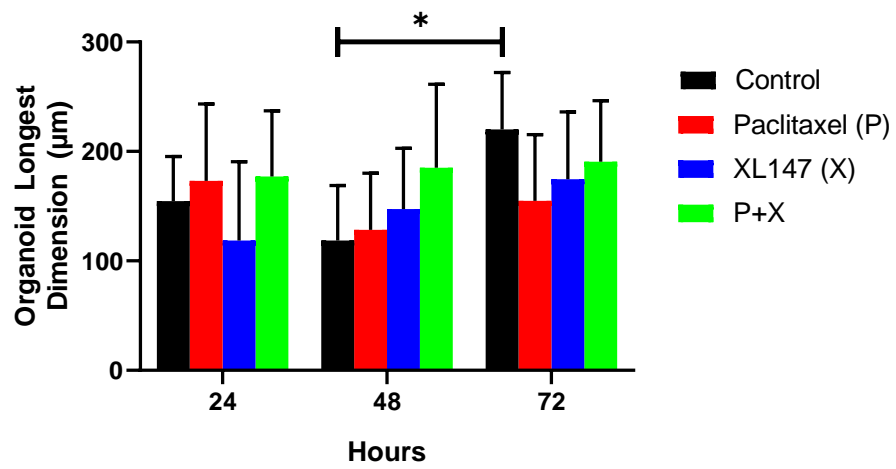

**Supplementary Figure S7. Effect of treatment on organoid size.** The length of the longest dimension in PyVmT organoids imaged with OMI. Error bars indicate mean  $\pm$  SD. \*  $p < 0.0005$  using a Wilcoxon rank-sum test.  $N > 5$  organoids per group and time point.
